# Supplementary material for: Shape-controlled synthesis of Ni nanocrystalsviaa wet-chemistry strategy and their shape-dependent catalytic activity
Source: Royal Society of Chemistry journal article supplement (doi:10.1039/c8ce01915k), 2019-01-01
Supplement: c8ce01915k1.pdf [file c8ce01915k1.pdf]

## **Supporting Information**

### **Shape-Controlled Synthesis of Ni Nanocrystals via a Wet-Chemistry Strategy and Their Shape-Dependent Catalytic Activity**

Wen Zhou,<sup>a,1</sup> Ming Zhou,<sup>a,1</sup> Jingrui Hu,<sup>b</sup> Hongmei Dong,<sup>a</sup> Yingqing Ou,<sup>a</sup>  
Lin Yang,<sup>b</sup> Xijun Wei,<sup>a</sup> Peng Xiao,<sup>\*b</sup> and Yunhuai Zhang,<sup>\*a</sup>

<sup>a</sup> College of Chemistry and Chemical Engineering, Chongqing University, Chongqing, 401331, China

<sup>b</sup> Chongqing Key Laboratory of Soft Condensed Matter Physics and Smart Materials, College of Physics, Chongqing University, Chongqing, 401331, China

#### **Corresponding authors**

\* E-mail: xiaopeng@cqu.edu.cn

\* E-mail: xp2031@163.com.

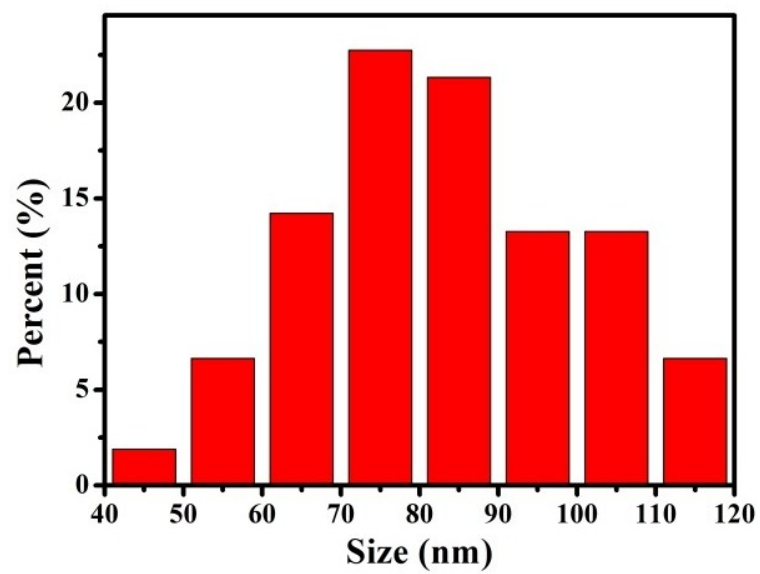

**Figure S1.** Size distribution diagrams of Ni nanocubes.

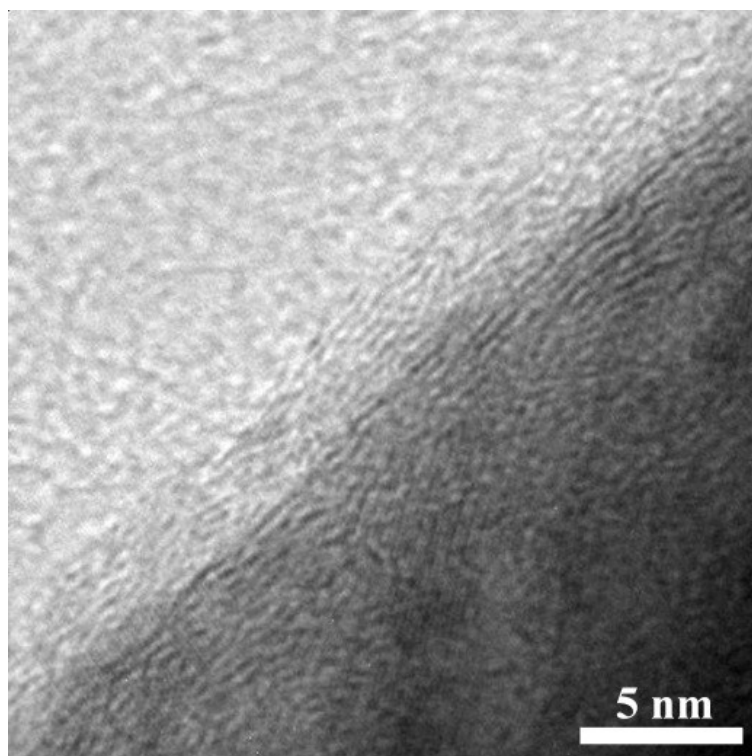

**Figure S2.** TEM image of a single Ni nanocube with a NiO shell thickness about 2.9 nm.

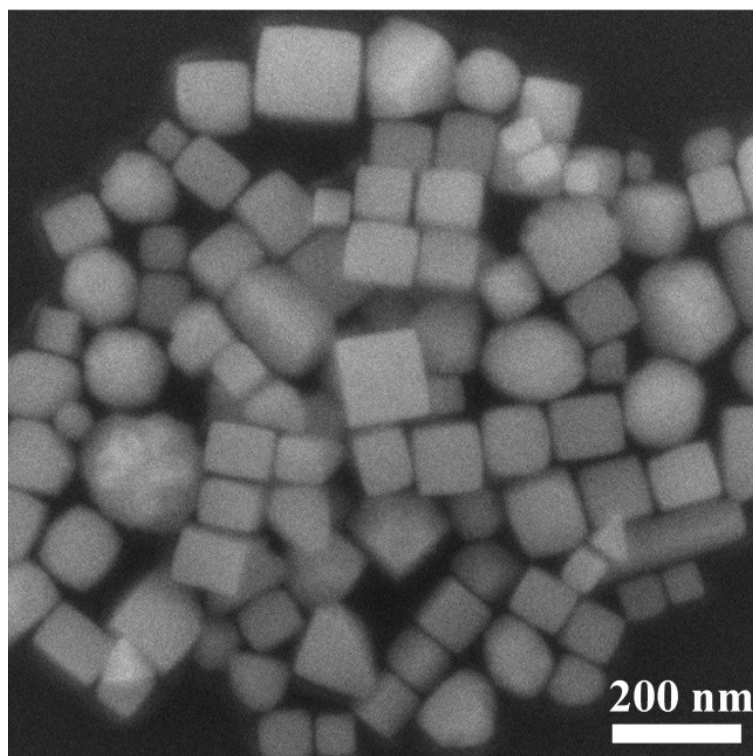

**Figure S3.** SEM image of the Ni nanocubes after 3 months dispersed in hexane.

The Ni nanocubes were seen by SEM (Figure 1A) to be stable for up to 3 months as a dispersion in hexane and retained their cubic morphology.

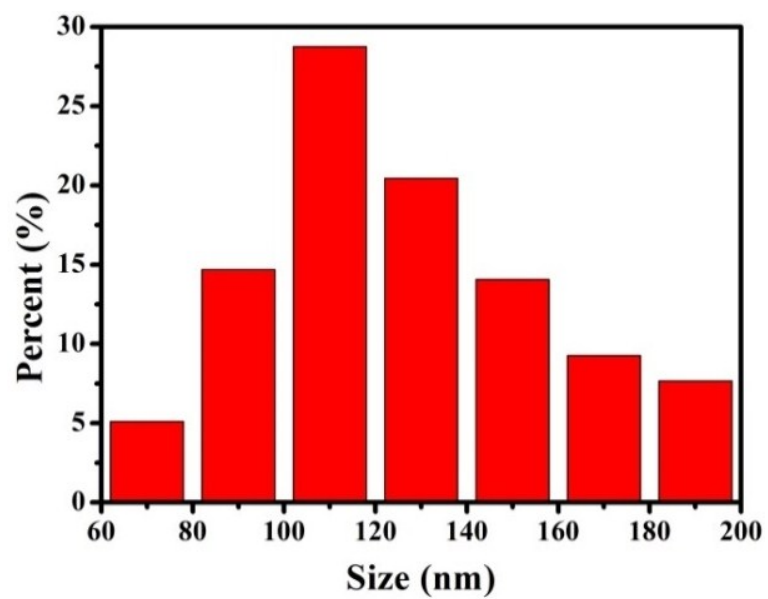

**Figure S4.** Size distribution diagrams of Ni cuboctahedra.

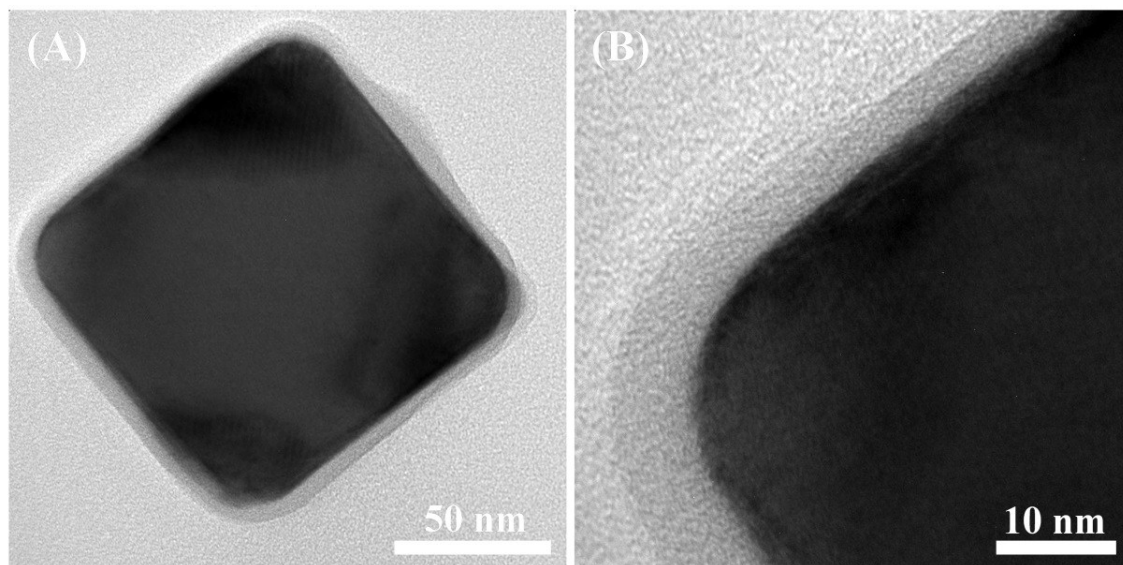

**Figure S5.** (A) TEM image of a single Ni cuboctahedron around with a lighter contrast. (B) high-magnification TEM image of a part of Ni cuboctahedra indicates a NiO shell thickness around 6 nm.

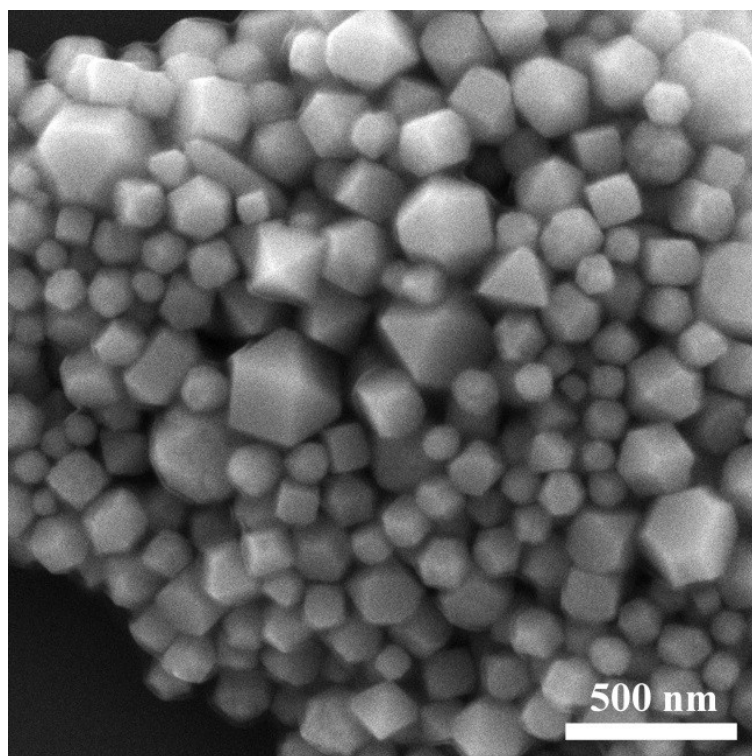

**Figure S6.** SEM image of Ni cuboctahedra after 3 months dispersed in hexane.

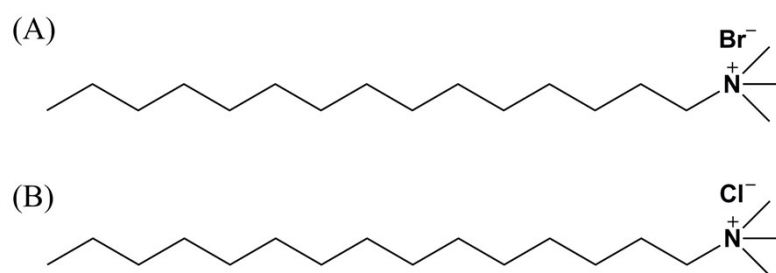

**Scheme S1.** Molecular structures of (A) CTAB and (B) CTAC.

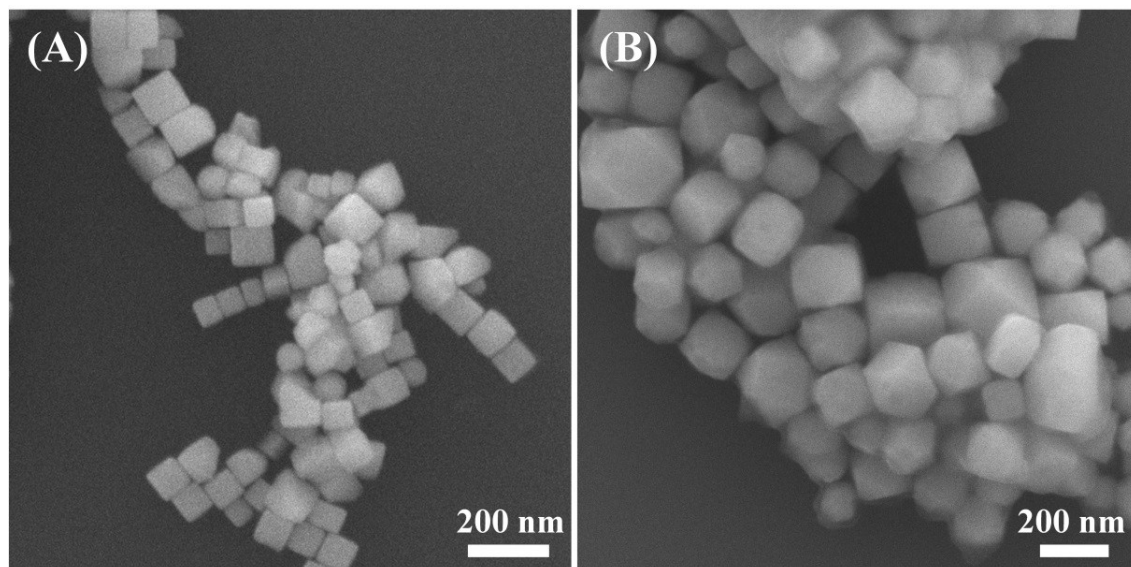

**Figure S7.** SEM images of Ni NCs prepared using standard procedure with cuboctahedra at different temperature, (A) 260 °C, (B) 280 °C, except for fixing the amount of HCHO at 100  $\mu$ L. The shape of Ni NCs tuned from nanocubes to cuboctahedra, and the average size are around 80 nm, 154 nm, respectively.



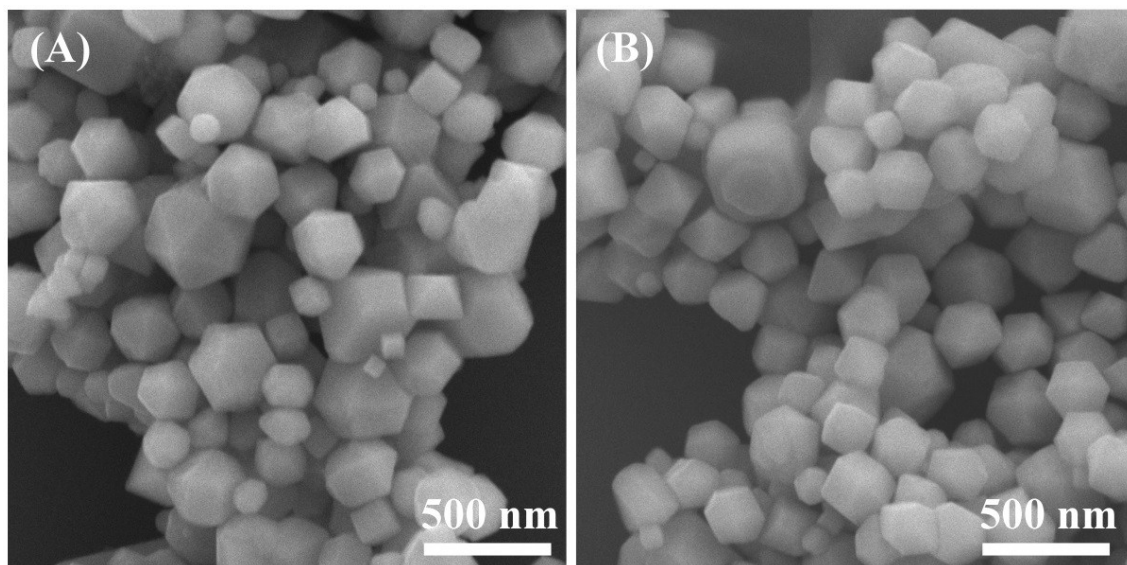

**Figure S8.** SEM images of Ni NCs prepared using standard procedure with nanocubes at different time intervals, (A) 80 min, (B) 120 min, respectively.

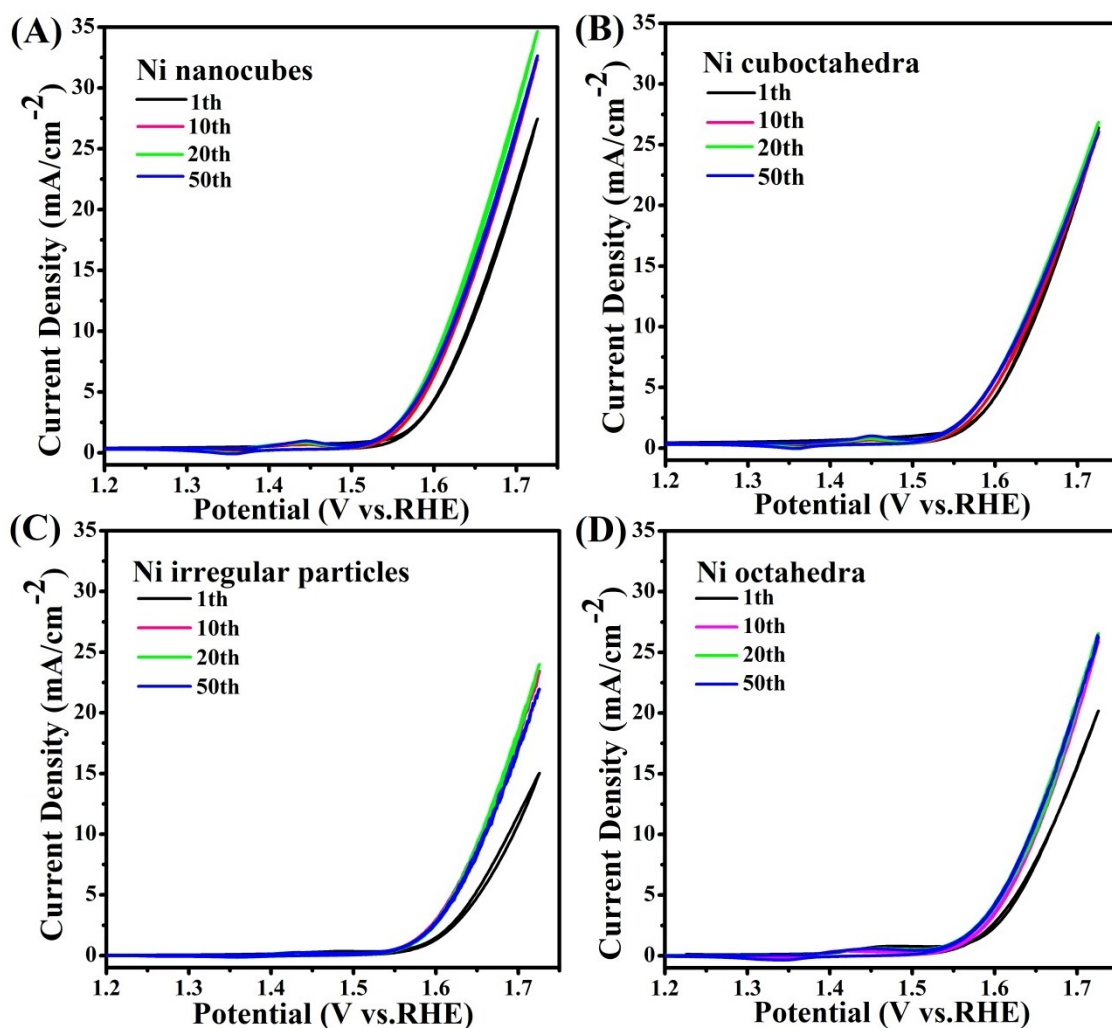

**Figure S9.** CV curves recorded at 1st, 10th, 20th, and 50th cycle for (A) Ni nanocubes, (B) Ni cuboctahedra, (C) Ni octahedral and (D) Ni irregular particles, respectively.

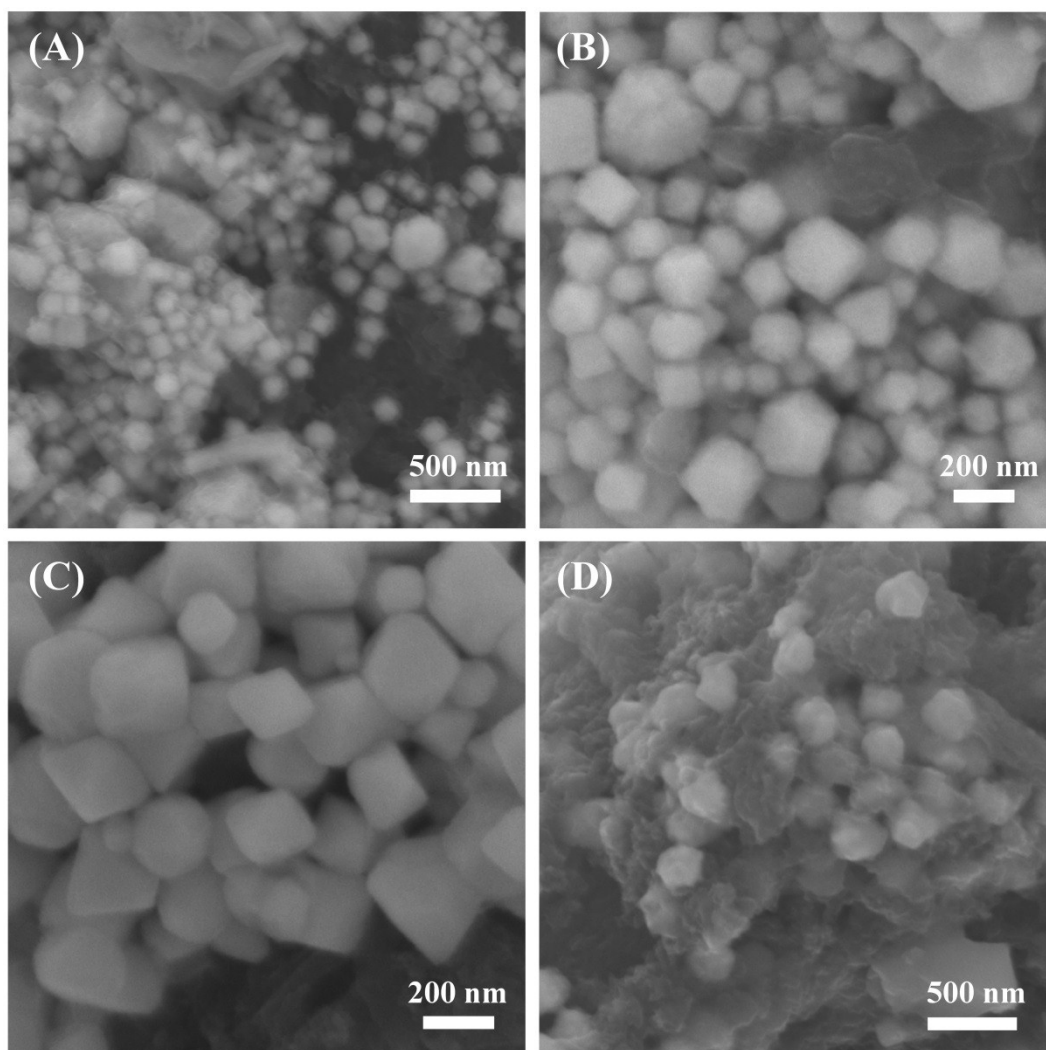

**Figure S10.** The SEM of Ni NCs obtained after the electrocatalytic tests, (A) nanocubes and (B) cuboctahedra, respectively.
